# Supplementary material
Source: PubMed Central journal article supplement (PMC4313291)

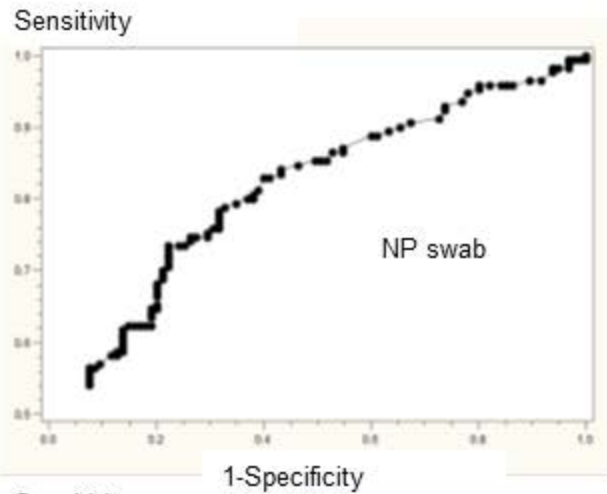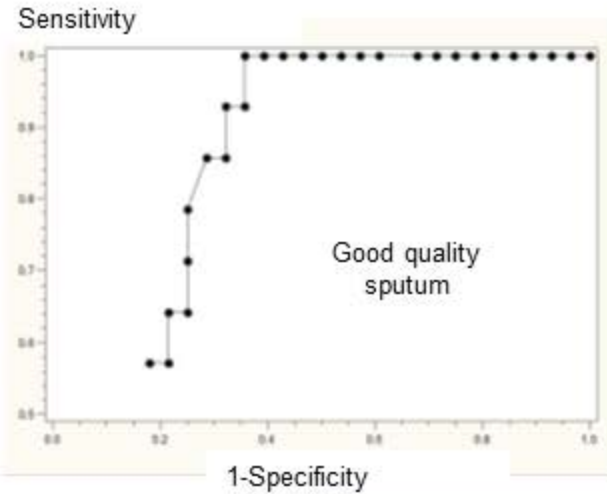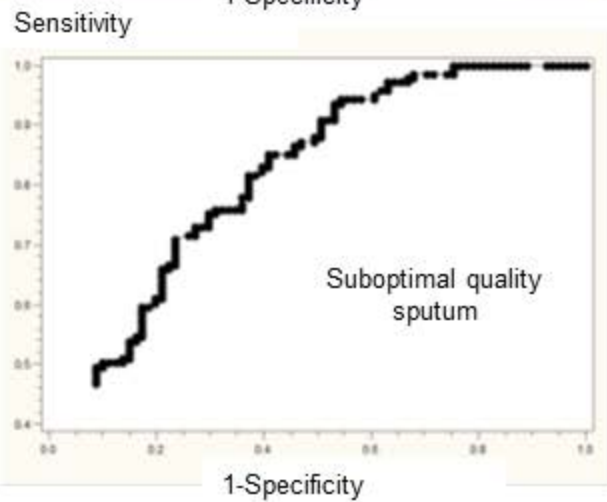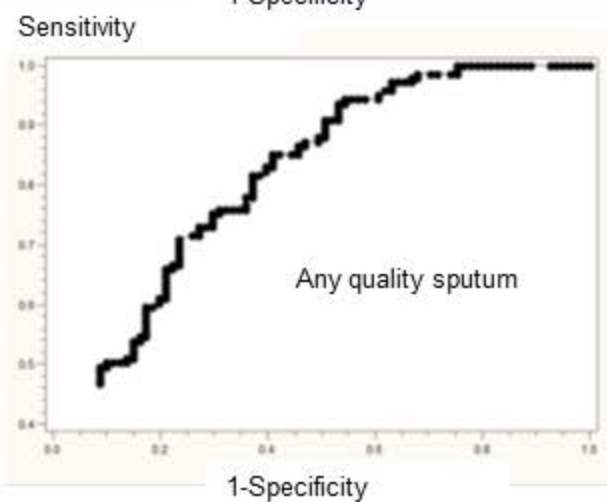

Supplement: JCM.01553-14_zjm999093864so1.pdf [file JCM.01553-14_zjm999093864so1.pdf]
